Title:

A Model Based Analysis for COVID-19 Pandemic in India: Implications for Health Systems and Policy for Low- and Middle-Income Countries

Authors:

Shankar Prinja, Pankaj Bahuguna, Yashika Chugh, Anna Vassal, Arvind Pandey, Sumit Aggarwal, Narendra Kumar Arora

Disclaimer statement:

The authors have withdrawn this manuscript because they do not wish this work to be cited as reference for the project. If you have any questions, please contact the corresponding author.
